# Supplementary material for: Somatic Embryogenesis and Flow Cytometric Assessment of Nuclear Genetic Stability for Sansevieria spp.: An Approach for In Vitro Regeneration of Ornamental Plants
Source: MDPI journal article supplement (doi:10.3390/horticulturae9020138), 2023-01-19
Supplement: s1 [file s1]

Archive with 1 entries (1 files):
- horticulturae-2094506-supplementary.pdf
